# Supplementary material
Source: PubMed Central journal article supplement (PMC7539652)
Supplement: jnm237347SupplementaryData.pdf [file jnm237347SupplementaryData.pdf]

## SUPPLEMENTAL MATERIALS AND METHODS

### Preparation of $^{18}\text{F}$ -labeled Cycratide

For  $^{18}\text{F}$  radiolabeling, cycratide was first conjugated with NOTA-NHS ester (CheMatech, Dijon, France). Briefly, 2  $\mu\text{mol}$  of cycratide was mixed with 6  $\mu\text{mol}$  of NOTA-NHS in 0.1 N  $\text{NaHCO}_3$  solution (pH 9.0). After stirring at room temperature for 4 h, the NOTA-conjugated cycratide (NOTA-cycratide) was purified by semipreparative HPLC and the product was confirmed by Matrix-assisted laser desorption/ionization time-of-flight mass spectrometry:  $m/z$  1,140.31 for  $[\text{MH}]^+$  ( $\text{C}_{49}\text{H}_{85}\text{N}_{15}\text{O}_{16}$ , calculated molecular weight 1,139.63 Da).

NOTA-cycratide was then labeled with  $^{18}\text{F}$  via NOTA- $\text{Al}^{18}\text{F}$  chelation. Briefly, No-carrier-added  $^{18}\text{F}^-$  (0.74–1.48 GBq) was mixed with 24 nmol  $\text{AlCl}_3$  in 100  $\mu\text{L}$  sodium acetate buffer (0.1 M, pH 4.0) for 5 min at room temperature. Subsequently, 40 nmol NOTA-cycratide was added and the mixture was heated at  $110^\circ\text{C}$  for 15 min. After purification with Sep-Pak C18 cartridges (Waters, Milford, MA), the product was passed through 0.22- $\mu\text{m}$  Millipore filters into sterile vials for further use. The radiochemical purity of  $^{18}\text{F}$ -cycratide was determined by analytical HPLC.

### Cell Uptake of $^{68}\text{Ga}$ -cycratide and $^{18}\text{F}$ -cycratide

The integrin  $\alpha\text{v}\beta 6$ -positive BxPC-3 cells were seeded into 12-well plates and incubated overnight at  $37^\circ\text{C}$  to allow adherence. After a brief wash with PBS, cells were incubated with  $^{68}\text{Ga}$ -cycratide or  $^{18}\text{F}$ -cycratide (37 kBq per well) at  $37^\circ\text{C}$  for 10, 20, 30, 60, 120, and 240 min. After washing six times with chilled PBS, cells were collected and cell-associated radioactivity was measured using a  $\gamma$  counter (Packard, Meriden, CT). The cell uptake was

expressed as the percent added dose (% AD) after decay correction. Experiments were performed 3 times with four parallel samples.

### **Comparison of $^{18}\text{F}$ -cycratide with $^{68}\text{Ga}$ -cycratide for Small-animal PET Imaging**

For direct comparison of the PET imaging of  $^{18}\text{F}$ -cycratide with  $^{68}\text{Ga}$ -cycratide, each BxPC-3 tumor-bearing nude mouse ( $n = 4$ ) was injected with 5.55 MBq  $^{18}\text{F}$ -cycratide via the tail vein. At 0.5, 1, and 2 h postinjection, 10-min static PET scanning was performed using a small-animal PET/CT scanner (Siemens Medical Solutions). On the second day, the same mice were injected with 5.55 MBq  $^{68}\text{Ga}$ -cycratide via the tail vein, and 10-min static PET imaging was performed at 0.5, 1, and 2 h postinjection using the same protocol.

### **Biodistribution of $^{18}\text{F}$ -cycratide**

Female BALB/c nude mice bearing subcutaneous BxPC-3 tumors were injected with 1.85 MBq  $^{18}\text{F}$ -cycratide to evaluate the distribution of the radiotracer in the main organs ( $n = 4$  per group). Mice were euthanized at 0.5, 1, and 2 h postinjection, and blood, tumor, and main organs/tissues were harvested, weighed, and measured using a  $\gamma$  counter.

### **$^{18}\text{F}$ -FDG and $^{68}\text{Ga}$ -cycratide PET Imaging in a Dual Tumor and Inflammation Mouse Model**

For the dual BxPC-3 and inflammation mouse model, 100  $\mu\text{L}$  of turpentine was injected in the left thigh muscle of the BxPC-3 tumor-bearing nude mice at 24–48 h before the PET imaging experiments. Mice ( $n = 3$ ) were injected with 3.7 MBq  $^{18}\text{F}$ -FDG via the tail vein, and 10-min static PET scans were acquired at 1 h postinjection. One day later, the same

mice were injected with 5.55 MBq  $^{68}\text{Ga}$ -cycratide, and then PET imaging was performed at 0.5 h postinjection using a small-animal PET/CT scanner (Siemens Medical Solutions).

**Supplemental Table 1.** Biodistribution of <sup>68</sup>Ga-cycratide in healthy volunteers (SUV, n = 5)

| Time (min) | Heart       | Liver       | Spleen      | Lung        | Kidney       | Intestine   | Bone marrow | Brain       | Muscle      | Pancreas    |
|------------|-------------|-------------|-------------|-------------|--------------|-------------|-------------|-------------|-------------|-------------|
| 5          | 5.05 ± 1.06 | 2.52 ± 0.70 | 3.34 ± 0.94 | 1.24 ± 0.53 | 13.94 ± 4.39 | 0.91 ± 0.28 | 1.36 ± 0.43 | 0.49 ± 0.13 | 0.84 ± 0.07 | 3.18 ± 0.96 |
| 15         | 2.93 ± 0.69 | 1.58 ± 0.43 | 1.99 ± 0.52 | 0.80 ± 0.39 | 8.72 ± 3.03  | 0.72 ± 0.17 | 0.81 ± 0.22 | 0.14 ± 0.04 | 0.66 ± 0.08 | 1.99 ± 0.66 |
| 25         | 2.21 ± 0.44 | 1.22 ± 0.30 | 1.49 ± 0.33 | 0.58 ± 0.21 | 6.19 ± 1.59  | 0.60 ± 0.22 | 0.64 ± 0.24 | 0.09 ± 0.04 | 0.57 ± 0.12 | 1.41 ± 0.55 |
| 35         | 1.84 ± 0.32 | 1.01 ± 0.27 | 1.26 ± 0.25 | 0.52 ± 0.24 | 5.57 ± 1.69  | 0.55 ± 0.20 | 0.57 ± 0.20 | 0.06 ± 0.03 | 0.49 ± 0.09 | 1.15 ± 0.31 |
| 45         | 1.55 ± 0.22 | 0.86 ± 0.17 | 1.00 ± 0.14 | 0.41 ± 0.18 | 4.55 ± 1.44  | 0.44 ± 0.30 | 0.56 ± 0.26 | 0.06 ± 0.03 | 0.45 ± 0.14 | 1.06 ± 0.33 |
| 60         | 1.35 ± 0.19 | 0.74 ± 0.14 | 0.95 ± 0.16 | 0.37 ± 0.15 | 4.11 ± 1.20  | 0.44 ± 0.20 | 0.55 ± 0.18 | 0.05 ± 0.03 | 0.37 ± 0.08 | 0.82 ± 0.26 |
| 120        | 0.71 ± 0.05 | 0.40 ± 0.08 | 0.55 ± 0.15 | 0.18 ± 0.03 | 2.49 ± 1.45  | 0.18 ± 0.14 | 0.33 ± 0.13 | 0.02 ± 0.01 | 0.18 ± 0.03 | 0.41 ± 0.14 |

**Supplemental Table 2.** Radiation-absorbed dose estimates of <sup>68</sup>Ga-cycratide in healthy volunteers (mGy/MBq; n = 5, [2 women, 3 men])

| Organ                    | Mean     | SD       |
|--------------------------|----------|----------|
| Adrenals                 | 1.57E-02 | 2.66E-03 |
| Brain                    | 2.70E-03 | 1.49E-03 |
| Esophagus                | 8.80E-03 | 3.38E-03 |
| Eyes                     | 5.78E-03 | 4.58E-03 |
| Gallbladder wall         | 1.10E-02 | 2.01E-03 |
| Left colon               | 1.30E-02 | 1.73E-03 |
| Small intestine          | 1.75E-02 | 7.39E-03 |
| Stomach wall             | 2.24E-02 | 1.87E-02 |
| Right colon              | 1.02E-02 | 2.40E-03 |
| Rectum                   | 2.62E-02 | 1.87E-02 |
| Heart wall               | 2.83E-02 | 7.99E-03 |
| Kidneys                  | 7.87E-02 | 4.98E-02 |
| Liver                    | 2.14E-02 | 1.27E-02 |
| Lungs                    | 2.61E-02 | 1.41E-02 |
| Ovaries*                 | 2.25E-01 | 7.78E-03 |
| Pancreas                 | 6.93E-03 | 1.25E-03 |
| Prostate**               | 2.32E-02 | 1.97E-02 |
| Salivary glands          | 1.03E-02 | 2.37E-03 |
| Red marrow               | 1.06E-02 | 4.37E-03 |
| Osteogenic cells         | 1.52E-02 | 6.79E-03 |
| Spleen                   | 3.49E-02 | 2.82E-02 |
| Testes**                 | 1.34E-02 | 4.60E-03 |
| Thymus                   | 8.88E-03 | 3.16E-03 |
| Thyroid                  | 2.86E-02 | 2.25E-02 |
| Urinary bladder wall     | 5.59E-01 | 6.40E-01 |
| Uterus*                  | 1.42E-01 | 4.95E-03 |
| Total body               | 1.30E-02 | 1.98E-03 |
| Effective dose (mSv/MBq) | 5.49E-02 | 4.69E-02 |

**Note:** \*, n = 2; \*\*, n = 3.

**Supplemental Table 3.** Characterizations of radiotracers reported in this study.

| <b>Radiotracer</b>          | <b>Labeling yield</b> | <b>Synthesis time</b> | <b>RCP</b> | <b>Metabolic stability*</b> | <b>Tumor uptake (0.5 h p.i.)</b> | <b>T/M ratio (0.5 h p.i.)</b> |
|-----------------------------|-----------------------|-----------------------|------------|-----------------------------|----------------------------------|-------------------------------|
| <sup>68</sup> Ga-linear-pep | > 95%                 | ~20 min               | > 99%      | 0 %                         | 0.94 ± 0.58 %ID/g                | 2.27 ± 0.71                   |
| <sup>68</sup> Ga-cycratide  | > 95%                 | ~20 min               | > 99%      | > 95%                       | 2.15 ± 0.46 %ID/g                | 3.06 ± 0.28                   |
| <sup>18</sup> F-cycratide   | 10~20%                | ~40 min               | > 99%      | > 95%                       | 1.64 ± 0.41 %ID/g                | 1.98 ± 0.82                   |

**Note:** RCP, radiochemical purity; p.i., postinjection; T/M ratio, tumor-to-muscle ratio; \*, Metabolic stability in the blood at 0.5 h postinjection.



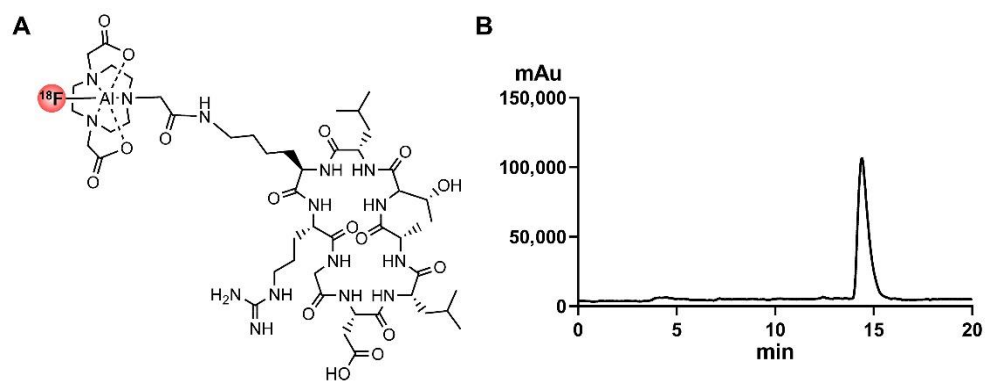

**Supplemental Fig. 2.** Chemical structure (A) and HPLC radiochromatogram (B) of synthesized  $^{18}\text{F}$ -cycratide.



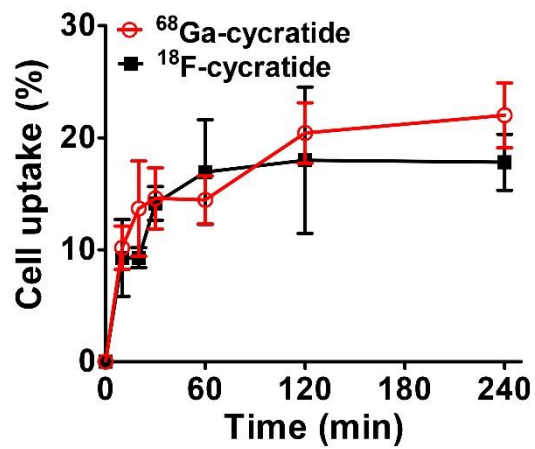

**Supplemental Fig. 3.** Cell uptake assay of <sup>68</sup>Ga-cycratide and <sup>18</sup>F-cycratide in BxPC-3 tumor cells (n = 4, mean ± SD).

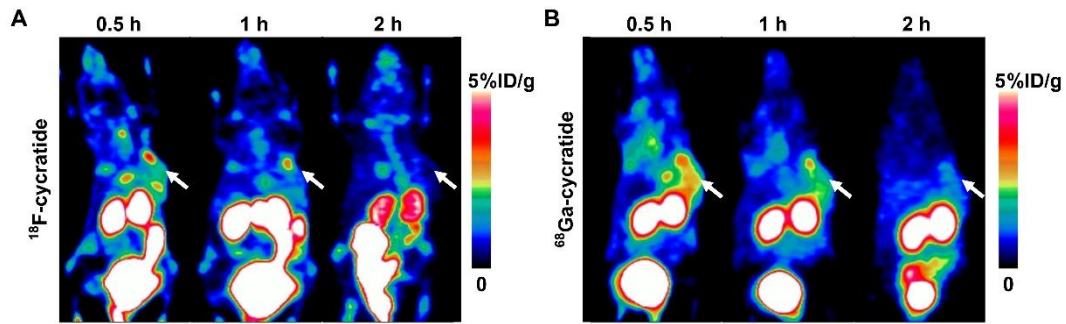

**Supplemental Fig. 4.** (A) Small-animal PET images obtained at 0.5, 1, and 2 h after injection of  $^{18}\text{F}$ -cycratide in the BxPC-3 tumor-bearing BALB/c nude mice ( $n = 4$ ). (B) Small-animal PET images obtained at 0.5, 1, and 2 h after injection of  $^{68}\text{Ga}$ -cycratide in the same mice on the second day after  $^{18}\text{F}$ -cycratide PET imaging. Tumors are indicated by arrows.

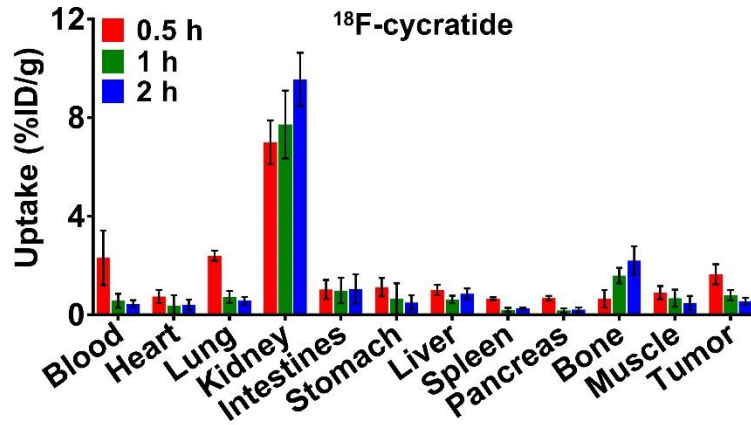

**Supplemental Fig. 5.** Biodistribution of <sup>18</sup>F-cycratide in BxPC-3 subcutaneous tumor-bearing BALB/c nude mice. Data are shown as mean ± SD, n = 4.

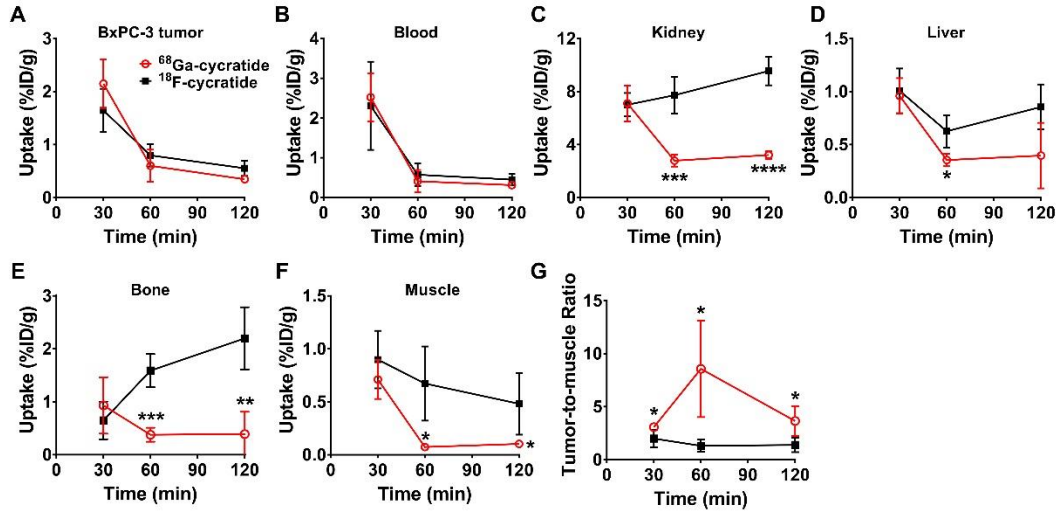

**Supplemental Fig. 6.** Comparison of the biodistribution of  $^{18}\text{F}$ -cycratide and  $^{68}\text{Ga}$ -cycratide in BxPC-3 subcutaneous tumor-bearing BALB/c nude mice. Data are shown as mean  $\pm$  SD,  $n = 4$ . \*,  $P < 0.05$ ; \*\*,  $P < 0.01$ ; \*\*\*,  $P < 0.001$ ; \*\*\*\*,  $P < 0.0001$ .

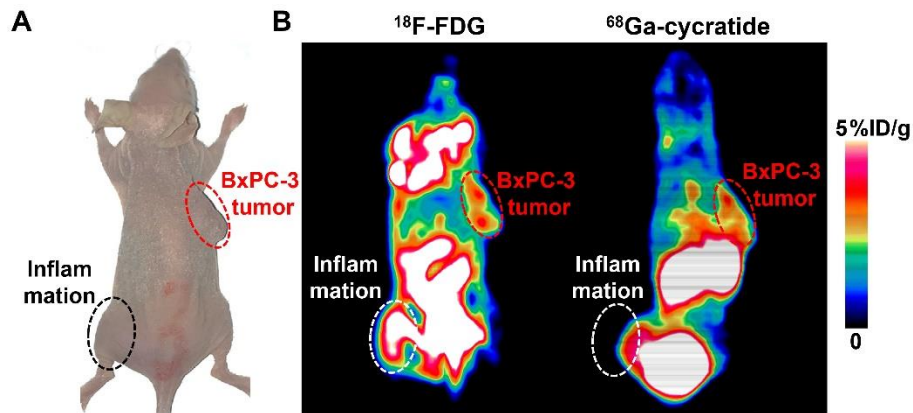

**Supplemental Figure 7.** PET imaging of  $^{18}\text{F}$ -FDG and  $^{68}\text{Ga}$ -cycratide in the dual inflammation and BxPC-3 tumor-bearing BALB/c nude mouse model ( $n = 3$ ). (A) A representative photograph of the dual inflammation and BxPC-3 tumor-bearing BALB/c nude mice. (B) Representative small-animal PET images obtained at 1 h after injection of  $^{18}\text{F}$ -FDG and one day later at 0.5 h after injection of  $^{68}\text{Ga}$ -cycratide in the same mouse. Tumors and inflammations are indicated by red and white dashed-line circles, respectively.
